# Supplementary material for: Noble-metal-free Ni10MoCox/Mo–Ni–O as an active and durable catalyst for hydrogen generation from hydrazine monohydrate
Source: Royal Society of Chemistry journal article supplement (doi:10.1039/d3ta04602h), 2023-01-01
Supplement: d3ta04602h1.pdf [file d3ta04602h1.pdf]

## Supplementary Material

### **Noble-metal-free $\text{Ni}_{10}\text{MoCo}_x/\text{Mo-Ni-O}$ as an active and durable catalyst for hydrogen generation from hydrazine monohydrate**

Si-Huan Qin, Yu-Ping Qiu\*, Mu-Hua Chen, Ping Wang\*

School of Materials Science and Engineering, South China University of Technology,

Guangzhou 510641, P.R. China

\*Corresponding author.

E-mails: [msypqiu@scut.edu.cn](mailto:msypqiu@scut.edu.cn) (Y.P. Qiu), [mppwang@scut.edu.cn](mailto:mppwang@scut.edu.cn) (P. Wang)

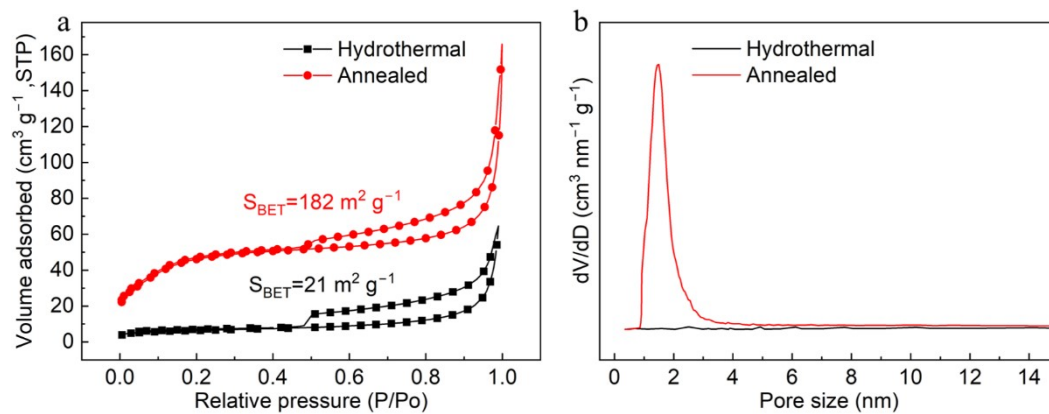

**Figure S1.** (a) N<sub>2</sub> adsorption-desorption isotherms and (b) pore size distributions of the hydrothermal and annealed samples.

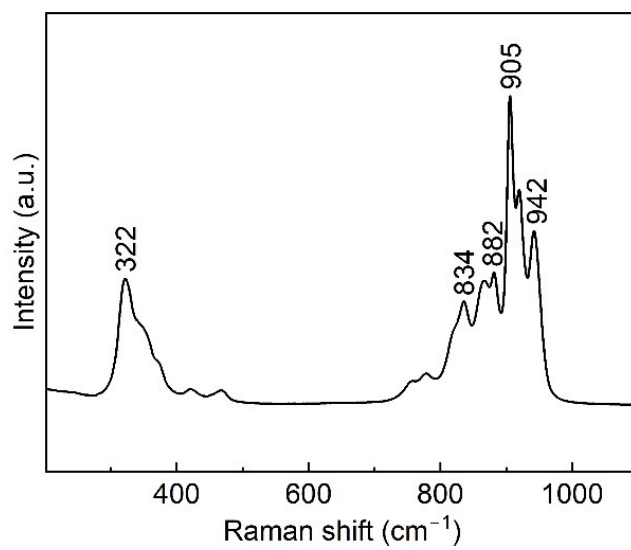

**Figure S2.** Raman spectrum of the hydrothermal sample.

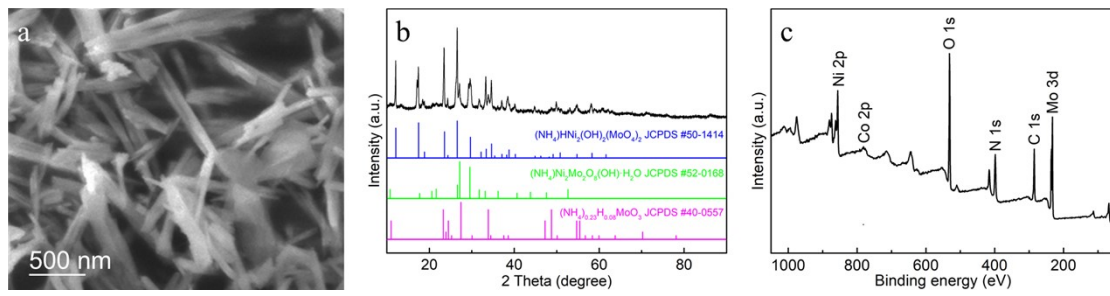

**Figure S3.** (a) FE-SEM image, (b) XRD pattern and (c) XPS spectrum of the SEA sample.

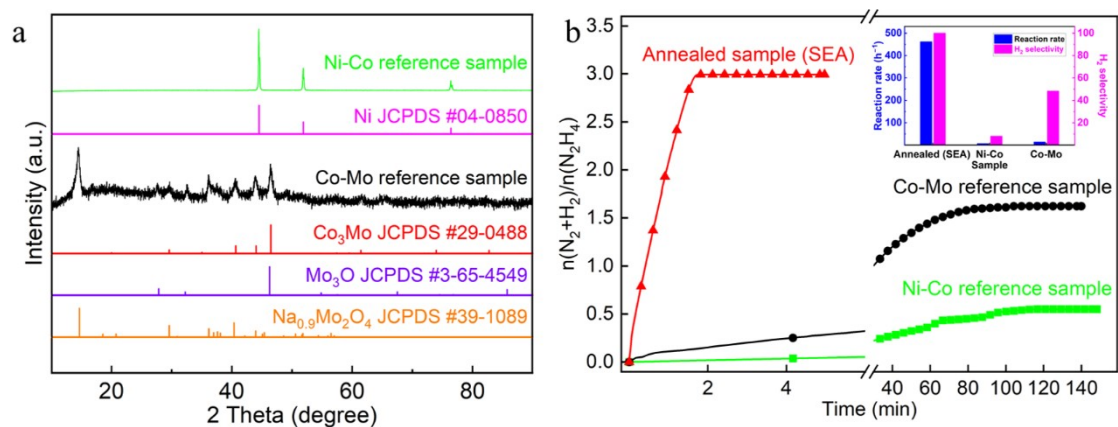

**Figure S4.** (a) XRD patterns of Ni-Co and Co-Mo reference samples. (b) Kinetic curves of  $\text{N}_2\text{H}_4 \cdot \text{H}_2\text{O}$  decomposition over the annealed sample (SEA) and Ni-Co, Co-Mo reference samples. The inset shows the reaction rate and  $\text{H}_2$  selectivity of the samples. The catalytic decomposition of  $\text{N}_2\text{H}_4 \cdot \text{H}_2\text{O}$  was carried out in a 2 mL solution containing 0.5 M  $\text{N}_2\text{H}_4 \cdot \text{H}_2\text{O}$  and 2.0 M NaOH at 70 °C, with metal/ $\text{N}_2\text{H}_4$  ratio of 1:10.

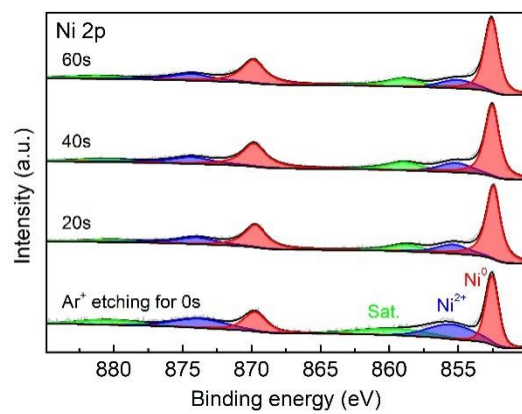

**Figure S5.** Ni 2p spectra of the annealed sample (SEA) as a function of etching time.

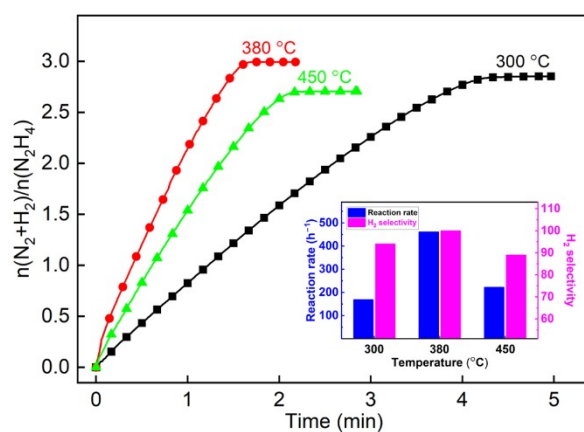

**Figure S6.** Kinetic curves of  $\text{N}_2\text{H}_4\cdot\text{H}_2\text{O}$  decomposition over the  $\text{Ni}_{10}\text{MoCo}_x/\text{Mo-Ni-O}$  catalyst annealed at different temperatures. The inset displays the reaction rate and  $\text{H}_2$  selectivity as a function of annealing temperature. The catalytic decomposition of  $\text{N}_2\text{H}_4\cdot\text{H}_2\text{O}$  was carried out in a 2 mL solution containing 0.5 M  $\text{N}_2\text{H}_4\cdot\text{H}_2\text{O}$  and 2.0 M NaOH, with metal/ $\text{N}_2\text{H}_4$  ratio of 1:10.

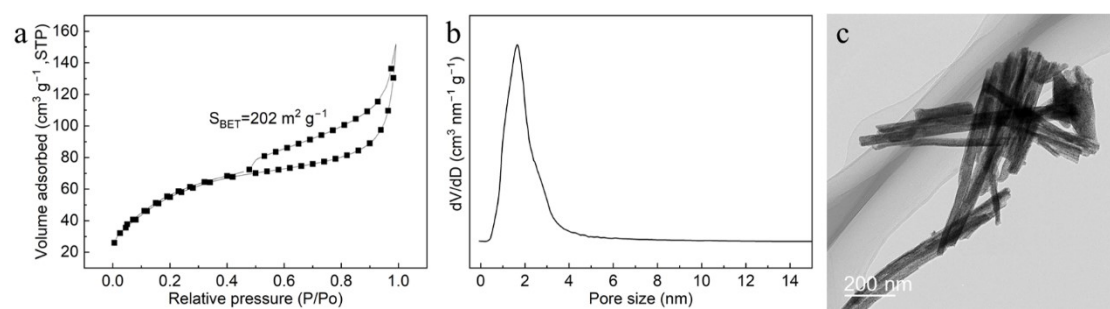

**Figure S7.** (a) N<sub>2</sub> adsorption-desorption isotherms, (b) pore size distributions and (c) TEM image of the Ni<sub>10</sub>Mo/Mo-Ni-O catalyst.



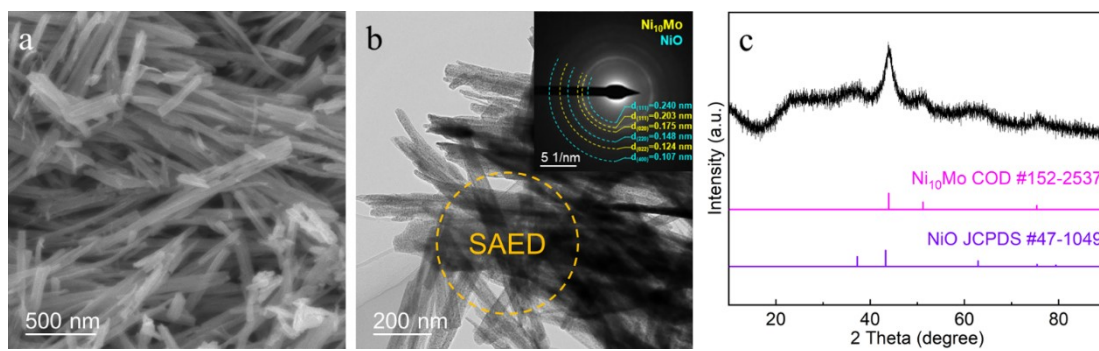

**Figure S8.** (a) FE-SEM image, (b) TEM image and the corresponding SAED pattern (inset) and (c) XRD pattern of the post-used Ni<sub>10</sub>MoCo<sub>x</sub>/Mo-Ni-O (SEA) sample.

**Table S1. A comparison of catalytic properties of Ni<sub>10</sub>MoCo<sub>x</sub>/Mo-Ni-O and relevant catalysts for H<sub>2</sub> generation from N<sub>2</sub>H<sub>4</sub>·H<sub>2</sub>O.**

| Catalyst                                                            | Temperature (°C) | Reaction rate (h <sup>-1</sup> ) | E <sub>a</sub> (kJ mol <sup>-1</sup> ) | Reference |
|---------------------------------------------------------------------|------------------|----------------------------------|----------------------------------------|-----------|
| NiMoB-La(OH) <sub>3</sub>                                           | 50               | 13.3                             | /                                      | 1         |
| Ni <sub>4</sub> W/WO <sub>2</sub> /NiWO <sub>4</sub>                | 50               | 33                               | /                                      | 2         |
| Ni/CeO <sub>2</sub>                                                 | 50               | 34                               | 56.2                                   | 3         |
| Ni <sub>10</sub> Mo/Ni-Mo-O                                         | 50               | 54.5                             | 55.8                                   | 4         |
| Ni@TNTs                                                             | 60               | 96                               | 53.2                                   | 5         |
| Cu@Fe <sub>5</sub> Ni <sub>5</sub>                                  | 70               | 11.9                             | 79.2                                   | 6         |
| FeNi/Cu                                                             | 70               | 17.6                             | 44                                     | 7         |
| Ni <sub>0.9</sub> Fe <sub>0.1</sub> -Cr <sub>2</sub> O <sub>3</sub> | 70               | 82.2                             | 86.3                                   | 8         |
| CuNi/La <sub>2</sub> O <sub>2</sub> CO <sub>3</sub> /rGO            | 70               | 114.3                            | 65.5                                   | 9         |
| Ni <sub>3</sub> Fe-(CeO <sub>x</sub> ) <sub>0.15</sub> /rGO         | 70               | 126.2                            | 34.3                                   | 10        |
| Ni <sub>10</sub> MoCo <sub>x</sub> /Mo-Ni-O                         | 50               | 122                              | 51.5                                   | This work |
|                                                                     | 70               | 461                              |                                        |           |

## References

1. J. Zhang, Q. Kang, Z. Yang, H. Dai, D. Zhuang, P. Wang, *J. Mater. Chem. A*, 2013, **1**, 11623–11628.
2. Q. Shi, D. X. Zhang, H. Yin, Y. P. Qiu, L. L. Zhou, C. Chen, H. Wu, P. Wang, *ACS Sustainable Chem. Eng.*, 2020, **8**, 5595–5603.
3. W. Kang, A. Varma, *Appl. Catal., B*, 2018, **220**, 409–416.
4. Y. P. Qiu, G. X. Cao, H. Wen, Q. Shi, H. Dai, P. Wang, *Int. J. Hydrogen Energy*, 2019, **44**, 15110–15117.
5. H. Wang, L. Wu, A. Jia, X. Li, Z. Shi, M. Duan, Y. Wang, *Chem. Eng. J.*, 2018, **332**, 637–646.
6. J. Wang, Y. Li, Y. Zhang, *Adv. Funct. Mater.*, 2014, **24**, 7073–7077.
7. K. V. Manukyan, A. Cross, S. Rouvimov, J. Miller, A. S. Mukasyan, E. E. Wolf, *Appl. Catal., A*, 2014, **476**, 47–53.
8. J. Chen, H. Zou, Q. Yao, M. Luo, X. Li, Z. H. Lu, *Appl. Surf. Sci.*, 2020, **501**, 144247.
9. X. Hong, Q. Yao, J. Long, X. Li, X. Chen, Z. H. Lu, *Ind. Eng. Chem. Res.*, 2021, **60**, 16224–16232.
10. Y. Men, X. Du, G. Cheng, W. Luo, *Int. J. Hydrogen Energy*, 2017, **42**, 27165–27173.
